# Supplementary figures and images for: Characterization of the structure, stability, and activity of hypoglycemic peptides fromMoringa oleiferaseed protein hydrolysates
Source: Royal Society of Chemistry journal article supplement (doi:10.1039/d1fo03413h), 2022-01-01

## Supporting Information

Figure S1.

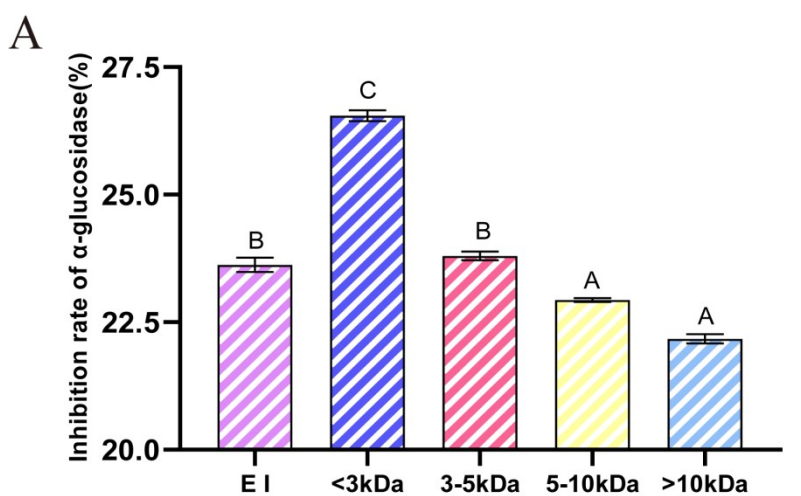

B

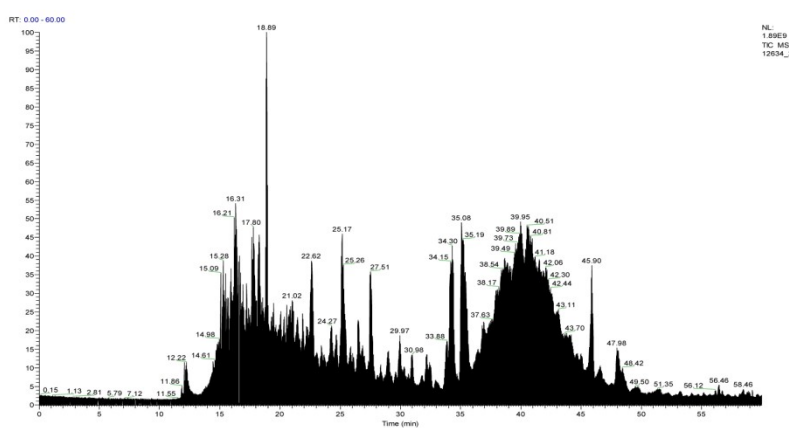

Figure S2.

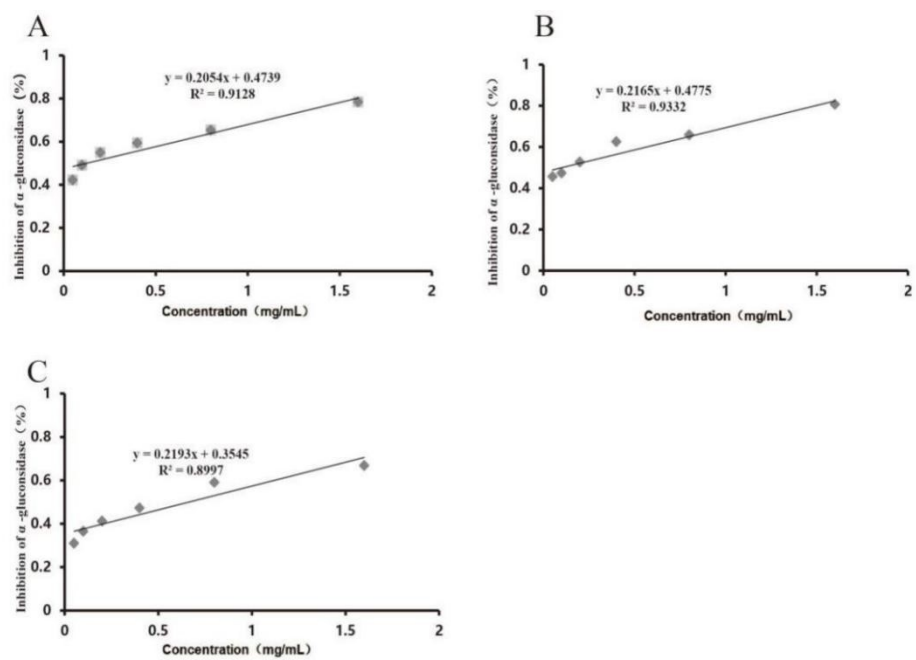

Supplement: d1fo03413h1.pdf [file d1fo03413h1.pdf]
